# Supplementary material for: Industry-funded versus non-profit-funded critical care research: a meta-epidemiological overview
Source: Springer Nature journal article supplement (doi:10.1007/s00134-018-5325-3), 2018-08-27
Supplement: MOESM1 [file 16075748]

**Supplement information**

**e-Supplement: Search strategy**

(((septic shock [ti] OR sepsis [ti] OR fluid [ti] OR fluid resuscitation [ti] OR hydroxyethyl starch OR albumin [ti]) AND (intensive care OR critical care)) OR respiratory failure [ti] OR ARDS [ti] OR acute respiratory distress syndrome [ti] OR ventilation [ti] OR ventilated [ti] OR critical care [ti] OR intensive care[ti]) AND (meta-analysis OR Cochrane Database Syst Rev [SO])

**e-Table 1: Description of trials with industry funding and sponsor-manufactured interventions (SMIs) in both or none of the arms**

| **Review** | **Description** |
| --- | --- |
|  | ***None arms of the comparisons were SMI*** |
| **Ng 2017** | Midazolam versus placebo (*Anand 1999*) funded by AstraZeneca. In the actual trial have three arms, the additional one being morphine which is manufactured by AstraZeneca but not midazolam. As it was outside the scope of the review the authors did not included the morphine arm.  As this trial was the only trial with industry funding, the entire review was excluded from the quantitative synthesis. |
| **Huang 2018** | Pantoprazole versus placebo (El-Kersh 2017) funded by Abbott nutrition. In the actual trial the comparison is intravenous pantoprazole and early enteral nutrition compared to placebo and early enteral. Abbott manufacture the product used for the enteral nutrition but not the pantoprazole.  As this trial was the only trial with industry funding, the entire review was excluded from the quantitative synthesis |
| **Gebistorf 2016** | Inhaled nitric oxide versus no intervention (*Mehta 2001*) partially funded by Pfizer Pharmaceutical. In the article authors give the manufacturers of all products and equipment use none of them are Pfizer. The article is not from a Pubmed index article. |
| **Liberati 2009** | Topical antibiotic versus no prophylaxis (*Camus 2005*) partially funded by GSK. In addition, some drugs were provided by AstraZeneca. The trial had another interventional arm which is manufactured by GSK but it was not taken into account by the authors as it was outside the scope of their review. |
| **Putzu 2017** | Continuous veno-venous hemofiltration versus control (*Cole 2002*) partially funded by Hospal Pty Ltd. The company covered the costs for cytokines and other biological measurements but were not the manufacturers of the experimental intervention. |
| **Osadnik 1996** | Non-invasive ventilation versus usual care (*Barbe 1996*) partially funded by CarburosMetalicos SA which produce gas products and equipment for hospitals however in the article all products and equipment have their manufacturers identified and none of them are CarburosMetalicos SA. The reason of their involvement is unclear. |
|  | ***Both arms of the comparisons were SMIs*** |
| **Sjovall 2017** | Five trials were concerned (*Alvarez-lema 2001, Brunkhorst 2012, Heyland 2008, Leroy 2005, and Schentag 1983*). The comparisons were 2 drugs versus one drug and sponsors manufactured products in both arms. The 2 drugs comparison was picked as the experimental arm as it represents more financial stakes for the sponsor. |
| **Guay 2015** | Low versus high volume ventilation (*Koner 2004*), high volume seem to be the current clinical practice and low volume seem to be the new method resulting from improvement of the technology thus the low intervention was chosen as the experimental arm. |
| **Siempos 2015** | Early versus late tracheostomy, (*Bosel 2013 and Rumbak 2004*) the industry manufactured the material to perform the tracheostomies. The late tracheostomy relies on the wait-and-see strategy while early tracheostomy can potential result in more patient receiving the intervention. The early strategy was picked as the experimental arm. |
| **Aitken 2015** | Protocol versus non-protocol directed sedation (*Bucknal 2008*), the protocol one in the most recent practice and was therefore picked as the experimental arm. |
| **Gillies 2017** | Heat and moisture exchangers versus heated humidifiers (*Boots 2006*), two different machines with two different manufactures which are both sponsors of the trial. The heated humidifiers being the more expensive one was chosen as the experimental arm. |
| **Moeller 2016** | Gelatin fluids for resuscitation *(Van der Heijden 2009 and Verheij 2006)* both trials were funded by BBraun Medical which manufactures both colloid (gelatin) and crystalloid (saline) fluids. The colloid was consider as being more expensive and was chosen as the experimental arm. |
| **Roberts 2016** | Continuous versus intermittent beta-Lactam infusion in severe sepsis (*Dulhunty 2015*), standard practice is stated as being the intermittent infusion. The continuous infusion was therefore chosen as the experimental arm. |

**e-Table 2: Primary continuous outcome topics excluded**

| **Author** | **Year** | **Indication** | **Outcome** | **Trials with industry** | **Trials without industry** | **Trials NR funding** | **Trials funding NA** | **Total sample size** |
| --- | --- | --- | --- | --- | --- | --- | --- | --- |
| Pu | 2017 | Sivelestat sodium in patients with acute lung injury or acute respiratory distress syndrome | Ventilation days | 2 | 1 | 1 | 1 | 778 |
| Pradelli | 2017 | Propofol or benzodiazepines for short- and long-term sedation | Weaning time | 9 | 10 | 1 | 1 | 1339 |
| Zhu | 2017 | Remifentanil versus other opioids for mechanically ventilated patients | Duration of mechanical ventilation | 9 | 2 | 5 | 2 | 1487 |
| Jerath | 2017 | Volatile Anesthetic Agents Compared With Standard Intravenous Midazolam/Propofol Sedation in Ventilated Critical Care Patients | Time to extubation | 4 | 2 | 1 | 0 | 476 |
| Constantin | 2016 | Sedation with dexmedetomidine in critical care patients | ICU length of stay | 5 | 4 | 2 | 0 | 1726 |
| Sun | 2015 | Volatile vs. propofol-based intravenous anesthetics on the alveolar inflammatory responses to one-lung ventilation | Alveolar levels of TNF-α | 2 | 1 | 2 | 0 | 235 |
| Rose | 2014 | Automated versus non-automated weaning for adults and children | Duration of weaning time | 4 | 6 | 4 | 2 | 1246 |

*NR: not reported; NA: Original article not accessible or not in English*

**e-Tables and e-Figures 3: Forest plots, ROR and sROR of sensitivity analyses**

1. **Only mortality outcomes (RORs and sROR)**


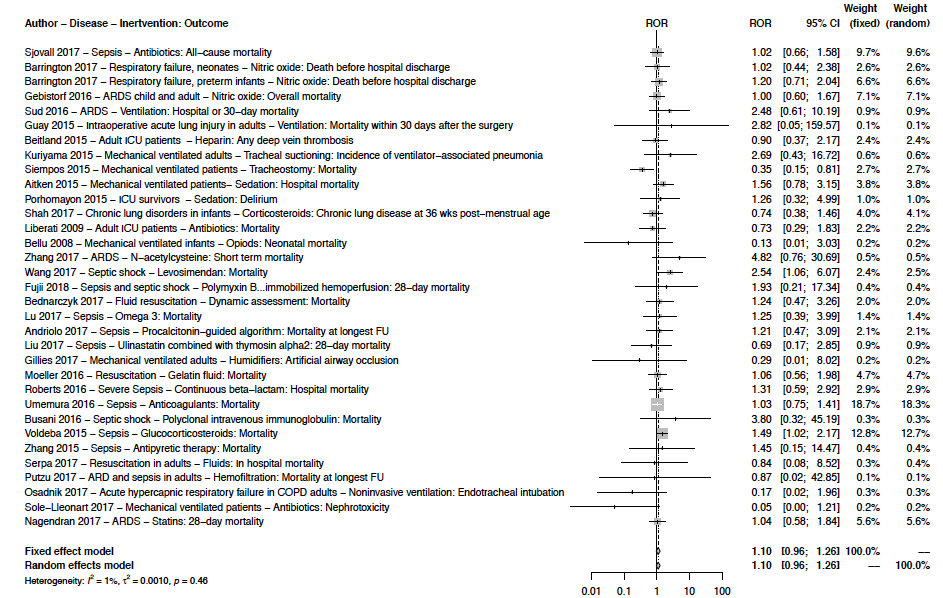


| **Author** | **Year** | **Disease** | **SMI** | **Control** | **Outcome** | **Trials with** | **Trials without** | **ROR p-val** | **ROR** | **OR with** | **OR without** |
| --- | --- | --- | --- | --- | --- | --- | --- | --- | --- | --- | --- |
| Sjovall | 2017 | Sepsis | Combination of antibiotics | One antibiotic | All-cause mortality | 7 | 1 | 0.92 | 1.02 [0.66; 1.58] | 1.18 [0.92; 1.52] | 1.16 [0.81; 1.66] |
| Barrington | 2017 | Respiratory failure neonates | Nitric oxide | Placebo or no intervention | Death before hospital discharge | 3 | 6 | 0.96 | 1.02 [0.44; 2.38] | 0.97 [0.49; 1.94] | 0.95 [0.58; 1.55] |
| Barrington | 2017 | Respiratory failure preterm | Nitric oxide | Placebo or no intervention | Death before hospital discharge | 9 | 4 | 0.50 | 1.2 [0.71; 2.04] | 1.05 [0.82; 1.36] | 0.88 [0.55; 1.4] |
| Gebistorf | 2016 | ARDS child and adult | Nitric oxide | Placebo or no intervention | Overall mortality | 5 | 5 | 1.00 | 1 [0.6; 1.67] | 1.06 [0.77; 1.45] | 1.06 [0.71; 1.58] |
| Sud | 2016 | ARDS | High frequency oscillatory ventilation | Conventional or pressure controlled ventilation | Hospital or 30-day mortality | 4 | 3 | 0.21 | 2.48 [0.61; 10.19] | 1.03 [0.55; 1.94] | 0.41 [0.12; 1.46] |
| Guay | 2015 | Intraoperative acute lung injury in adults | Low tidal volume ventilation | High tidal volume ventilation | Mortality within 30 days after the surgery | 1 | 7 | 0.62 | 2.82 [0.05; 159.58] | 1.9 [0.04; 100.63] | 0.68 [0.32; 1.42] |
| Siempos | 2015 | Mechanical ventilated | Early tracheostomy | Late tracheostomy | Mortality | 1 | 6 | 0.01 | 0.35 [0.15; 0.81] | 0.29 [0.14; 0.61] | 0.82 [0.58; 1.16] |
| Aitken | 2015 | Mechanical ventilated | Protocol-directed sedation | Non-protocol-directed sedation | Hospital mortality | 1 | 1 | 0.21 | 1.56 [0.78; 3.15] | 1.21 [0.72; 2.04] | 0.78 [0.49; 1.24] |
| Liberati | 2009 | Adult ICU patients | Antibiotic | No prophylaxis | Mortality | 9 | 2 | 0.51 | 0.73 [0.29; 1.83] | 0.83 [0.69; 1] | 1.13 [0.46; 2.78] |
| Bellu | 2008 | Mechanical ventilated infants | Opioids | Placebo or no intervention | Neonatal mortality | 1 | 3 | 0.21 | 0.13 [0.01; 3.03] | 0.16 [0.01; 3.51] | 1.19 [0.81; 1.73] |
| Adhikari | 2004 | Acute lung injury and ARDS in adults | Prostaglandin, N-acetylcysteine, or Surfactant | Placebo or no intervention | Mortality (early, all cause) | 10 | 1 | 0.15 | 0.5 [0.2; 1.28] | 0.96 [0.77; 1.2] | 1.91 [0.77; 4.74] |
| Zhang | 2017 | ARDS | N-acetylcysteine | Placebo | Short term mortality | 3 | 1 | 0.10 | 4.82 [0.76; 30.69] | 0.8 [0.38; 1.71] | 0.17 [0.03; 0.9] |
| Serpa | 2017 | Resuscitation in adults | Balanced saline | Isotonic saline | In hospital mortality | 2 | 2 | 0.88 | 0.84 [0.08; 8.52] | 0.87 [0.65; 1.17] | 1.03 [0.1; 10.26] |
| Putzu | 2017 | ARD and sepsis in adults | Continuous veno-venous hemofiltration | No intervention | Mortality at longest follow-up | 2 | 2 | 0.95 | 0.87 [0.02; 42.85] | 0.27 [0.01; 11.97] | 0.31 [0.13; 0.76] |
| Nagendran | 2017 | ARDS | Statins | Placebo | 28 day mortality | 1 | 4 | 0.91 | 1.04 [0.58; 1.84] | 1.11 [0.79; 1.56] | 1.07 [0.67; 1.71] |
| Wang | 2017 | Septic shock | Levosimendan | Acitve/placebo/no | Mortality | 1 | 4 | 0.04 | 2.54 [1.06; 6.07] | 1.23 [0.86; 1.77] | 0.49 [0.22; 1.07] |
| Fujii | 2018 | Sepsis and septic shock | Polymyxin B‑immobilized hemoperfusion | No intervention | 28 day mortality | 4 | 1 | 0.56 | 1.93 [0.21; 17.34] | 1.07 [0.68; 1.7] | 0.56 [0.06; 4.76] |
| Bednarczyk | 2017 | Fluid resuscitation | Dynamic assessment | No intervention | Mortality | 5 | 7 | 0.66 | 1.24 [0.47; 3.26] | 0.66 [0.28; 1.58] | 0.53 [0.35; 0.82] |
| Lu | 2017 | Sepsis | Omega-3 | Placebo/no | Mortality | 6 | 3 | 0.71 | 1.25 [0.39; 3.99] | 0.87 [0.52; 1.48] | 0.7 [0.25; 1.98] |
| Andriolo | 2017 | Sepsis | Procalcitonin-guided algorithm | No intervention | Mortality at longest follow-up | 3 | 1 | 0.69 | 1.21 [0.47; 3.09] | 1.03 [0.65; 1.65] | 0.86 [0.38; 1.94] |
| Liu | 2017 | Sepsis | Ulinastatin combined with thymosin alpha2 | Placebo/no | 28 day mortality | 1 | 1 | 0.61 | 0.69 [0.17; 2.85] | 0.31 [0.09; 1.02] | 0.45 [0.21; 0.95] |
| Moeller | 2016 | Resuscitation | Gelatin | Active | Mortality | 4 | 5 | 0.86 | 1.06 [0.56; 1.98] | 1.4 [0.83; 2.37] | 1.32 [0.94; 1.87] |
| Roberts | 2016 | Severe sepsis | Continuous beta-lactam | Active | Hospital mortality | 1 | 2 | 0.51 | 1.31 [0.59; 2.92] | 0.73 [0.46; 1.16] | 0.56 [0.29; 1.07] |
| Umemura | 2016 | Sepsis | Anticoagulants | Placebo/no | Mortality | 9 | 7 | 0.87 | 1.03 [0.75; 1.41] | 0.96 [0.87; 1.07] | 0.94 [0.7; 1.26] |
| Busani | 2016 | Septic shock | Polyclonal intravenous immunoglobulin | Active/no | Mortality | 6 | 2 | 0.29 | 3.8 [0.32; 45.2] | 0.91 [0.65; 1.27] | 0.24 [0.02; 2.77] |
| Volbeda | 2015 | Sepsis | Glucocorticosteroids | Placebo/no | Mortality | 8 | 10 | 0.04 | 1.49 [1.02; 2.17] | 1.12 [0.86; 1.46] | 0.75 [0.57; 0.99] |
| Zhang | 2015 | Sepsis | Antipyretic therapy | Placebo/no | Mortality | 2 | 2 | 0.75 | 1.45 [0.15; 14.47] | 0.96 [0.11; 8.64] | 0.66 [0.34; 1.3] |

1. **Trials supplied by industry merged with industry funded trials (RORs and sROR)**


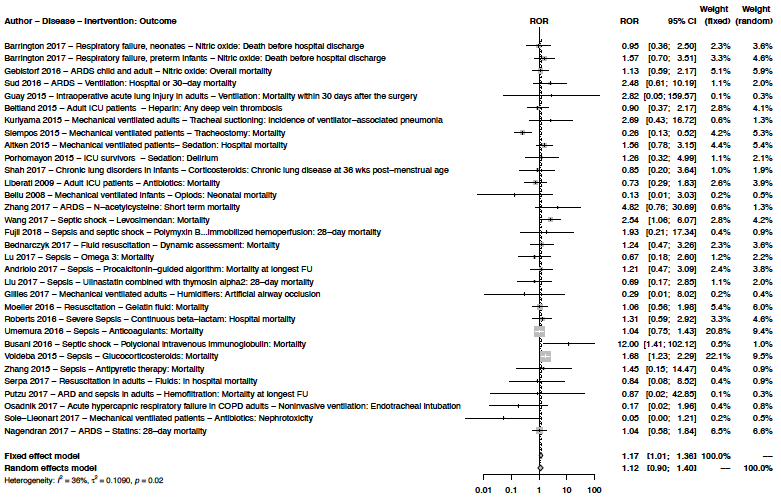


| **Author** | **Year** | **SMI** | **Control** | **Disease** | **Outcome** | **Trials supplied*** | **Trials with** | **Trials without** | **ROR_p-val** | **ROR** | **OR with** | **OR without** |
| --- | --- | --- | --- | --- | --- | --- | --- | --- | --- | --- | --- | --- |
| Barrington | 2017 | Nitric oxide | Placebo or no intervention | Respiratory failure neonates | Death before hospital discharge | 2 | 5 | 4 | 0.92 | 0.95 [0.36; 2.5] | 0.95 [0.6; 1.49] | 1 [0.43; 2.34] |
| Barrington | 2017 | Nitric oxide | Placebo or no intervention | Respiratory failure preterm | Death before hospital discharge | 3 | 12 | 1 | 0.27 | 1.57 [0.7; 3.51] | 1.05 [0.85; 1.31] | 0.67 [0.31; 1.45] |
| Gebistorf | 2016 | Nitric oxide | Placebo or no intervention | ARDS child and adult | Overall mortality | 1 | 6 | 4 | 0.70 | 1.13 [0.59; 2.17] | 1.08 [0.82; 1.42] | 0.95 [0.53; 1.72] |
| Sud | 2016 | High frequency oscillatory ventilation | Conventional or pressure controlled ventilation | ARDS | Hospital or 30-day mortality | 0 | 4 | 3 | 0.21 | 2.48 [0.61; 10.19] | 1.03 [0.55; 1.94] | 0.41 [0.12; 1.46] |
| Guay | 2015 | Low tidal volume ventilation | High tidal volume ventilation | Intraoperative acute lung injury in adults | Mortality within 30 days after the surgery | 0 | 1 | 7 | 0.62 | 2.82 [0.05; 159.58] | 1.9 [0.04; 100.63] | 0.68 [0.32; 1.42] |
| Beitland | 2015 | Low molecular heparin | Unfractionated heparin | Adult ICU patients | Any deep vein thrombosis | 0 | 2 | 1 | 0.81 | 0.9 [0.37; 2.17] | 0.76 [0.33; 1.77] | 0.85 [0.67; 1.07] |
| Kuriyama | 2015 | Closed tracheal suctioning systems | Open tracheal suctioning systems | Mechanical ventilated adults | Incidence of ventilator-associated pneumonia | 0 | 2 | 3 | 0.29 | 2.69 [0.43; 16.72] | 0.64 [0.34; 1.19] | 0.24 [0.04; 1.31] |
| Siempos | 2015 | Early tracheostomy | Late tracheostomy | Mechanical ventilated | Mortality | 1 | 2 | 5 | 0.00 | 0.26 [0.13; 0.52] | 0.24 [0.12; 0.47] | 0.92 [0.75; 1.14] |
| Aitken | 2015 | Protocol-directed sedation | Non-protocol-directed sedation | Mechanical ventilated | Hospital mortality | 0 | 1 | 1 | 0.21 | 1.56 [0.78; 3.15] | 1.21 [0.72; 2.04] | 0.78 [0.49; 1.24] |
| Porhomayon | 2015 | Light sedation | Heavy or standard sedation | ICU survivors | Delirium | 0 | 2 | 5 | 0.75 | 1.26 [0.32; 4.99] | 1.02 [0.33; 3.18] | 0.81 [0.37; 1.77] |
| Shah | 2017 | Corticosteroids | Placebo or no intervention | Chronic lung disorders in infants | Chronic lung disease at 36 wks post-menstrual age (among survivors) | 1 | 3 | 1 | 0.83 | 0.85 [0.2; 3.64] | 0.66 [0.5; 0.87] | 0.77 [0.19; 3.2] |
| Liberati | 2009 | Antibiotic | No prophylaxis | Adult ICU patients | Mortality | 0 | 9 | 2 | 0.51 | 0.73 [0.29; 1.83] | 0.83 [0.69; 1] | 1.13 [0.46; 2.78] |
| Bellu | 2008 | Opioids | Placebo or no intervention | Mechanical ventilated infants | Neonatal mortality | 0 | 1 | 3 | 0.21 | 0.13 [0.01; 3.03] | 0.16 [0.01; 3.51] | 1.19 [0.81; 1.73] |
| Zhang | 2017 | N-acetylcysteine | Placebo | ARDS | Short term mortality | 0 | 3 | 1 | 0.10 | 4.82 [0.76; 30.69] | 0.8 [0.38; 1.71] | 0.17 [0.03; 0.9] |
| Gillies | 2017 | Heated humidifiers | Heat and moisture exchangers | Mechanical ventilated adults | Artificial airway occlusion | 0 | 5 | 1 | 0.47 | 0.28 [0.01; 7.79] | 2.04 [0.48; 8.72] | 7.15 [0.37; 139.77] |
| Serpa | 2017 | Balanced saline | Isotonic saline | Resuscitation in adults | In hospital mortality | 0 | 2 | 2 | 0.88 | 0.84 [0.08; 8.52] | 0.87 [0.65; 1.17] | 1.03 [0.1; 10.26] |
| Putzu | 2017 | Continuous veno-venous hemofiltration | No intervention | ARD and sepsis in adults | Mortality at longest follow-up | 0 | 2 | 2 | 0.95 | 0.87 [0.02; 42.85] | 0.27 [0.01; 11.97] | 0.31 [0.13; 0.76] |
| Osadnik | 2017 | Non-invasive ventilation | Usual care | Acute hypercapnic respiratory failure COPD adults | Endotracheal intubation | 0 | 1 | 9 | 0.16 | 0.17 [0.02; 1.96] | 0.05 [0; 0.54] | 0.29 [0.19; 0.43] |
| Sole-Lleonart | 2017 | Nebulized antibiotics | Intravenous antibiotics | Mechanical ventilated | Nephrotoxicity | 0 | 1 | 1 | 0.07 | 0.05 [0; 1.21] | 0.06 [0; 1.24] | 1.18 [0.47; 2.97] |
| Nagendran | 2017 | Statins | Placebo | ARDS | 28 day mortality | 0 | 1 | 4 | 0.91 | 1.04 [0.58; 1.84] | 1.11 [0.79; 1.56] | 1.07 [0.67; 1.71] |
| Wang | 2017 | Levosimendan | Acitve/placebo/no | Septic shock | Mortality | 0 | 1 | 4 | 0.04 | 2.54 [1.06; 6.07] | 1.23 [0.86; 1.77] | 0.49 [0.22; 1.07] |
| Fujii | 2018 | Polymyxin B‑immobilized hemoperfusion | No intervention | Sepsis and septic shock | 28 day mortality | 0 | 4 | 1 | 0.56 | 1.93 [0.21; 17.34] | 1.07 [0.68; 1.7] | 0.56 [0.06; 4.76] |
| Bednarczyk | 2017 | Dynamic assessment | No intervention | Fluid resuscitation | Mortality | 0 | 5 | 7 | 0.66 | 1.24 [0.47; 3.26] | 0.66 [0.28; 1.58] | 0.53 [0.35; 0.82] |
| Lu | 2017 | Omega-3 | Placebo/no | Sepsis | Mortality | 1 | 7 | 2 | 0.57 | 0.67 [0.18; 2.6] | 0.8 [0.49; 1.31] | 1.18 [0.34; 4.16] |
| Andriolo | 2017 | Procalcitonin-guided algorithm | No intervention | Sepsis | Mortality at longest follow-up | 0 | 3 | 1 | 0.69 | 1.21 [0.47; 3.09] | 1.03 [0.65; 1.65] | 0.86 [0.38; 1.94] |
| Liu | 2017 | Ulinastatin combined with thymosin alpha2 | Placebo/no | Sepsis | 28 day mortality | 0 | 1 | 1 | 0.61 | 0.69 [0.17; 2.85] | 0.31 [0.09; 1.02] | 0.45 [0.21; 0.95] |
| Moeller | 2016 | Gelatin | Active | Resuscitation | Mortality | 0 | 4 | 5 | 0.86 | 1.06 [0.56; 1.98] | 1.4 [0.83; 2.37] | 1.32 [0.94; 1.87] |
| Roberts | 2016 | Continuous beta-lactam | Active | Severe sepsis | Hospital mortality | 0 | 1 | 2 | 0.51 | 1.31 [0.59; 2.92] | 0.73 [0.46; 1.16] | 0.56 [0.29; 1.07] |
| Umemura | 2016 | Anticoagulants | Placebo/no | Sepsis | Mortality | 1 | 10 | 6 | 0.82 | 1.04 [0.75; 1.43] | 0.96 [0.87; 1.07] | 0.93 [0.68; 1.26] |
| Busani | 2016 | Polyclonal intravenous immunoglobulin | Active/no | Septic shock | Mortality | 1 | 7 | 1 | 0.02 | 12 [1.41; 102.12] | 0.96 [0.74; 1.25] | 0.08 [0.01; 0.67] |
| Volbeda | 2015 | Glucocorticosteroids | Placebo/no | Sepsis | Mortality | 1 | 9 | 9 | 0.00 | 1.68 [1.23; 2.29] | 1.13 [0.93; 1.38] | 0.68 [0.53; 0.86] |
| Zhang | 2015 | Antipyretic therapy | Placebo/no | Sepsis | Mortality | 0 | 2 | 2 | 0.75 | 1.45 [0.15; 14.47] | 0.96 [0.11; 8.64] | 0.66 [0.34; 1.3] |

**Number of trials supplied by the industry before being merged with the trials with industry funding*

1. **Excluding trials with 0 events in both arms (RORs and sROR)**

**
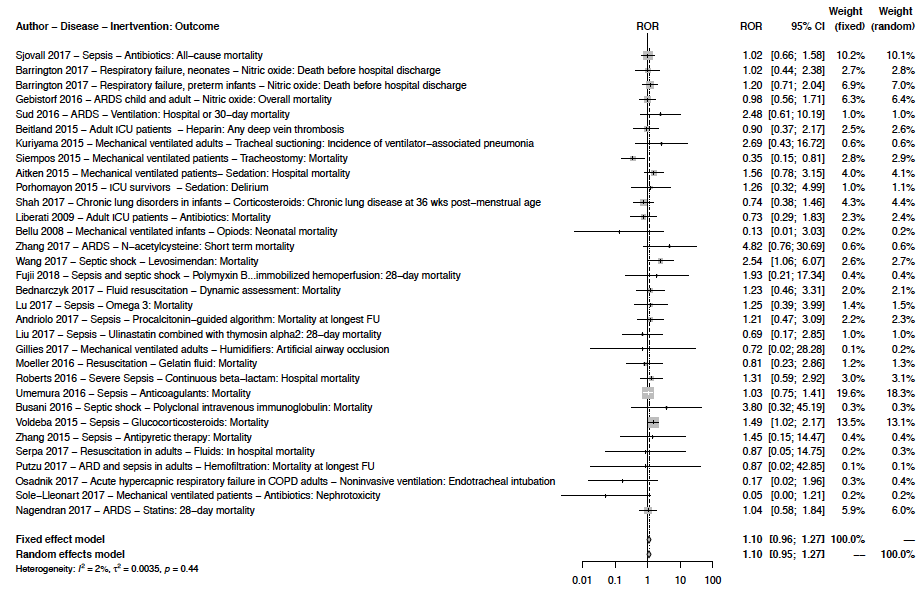
**

| **Author** | **Year** | **SMI** | **Control** | **Disease** | **Outcome** | **Trials with** | **Trials without** | **ROR p-val** | **ROR** | **OR with** | **OR without** |
| --- | --- | --- | --- | --- | --- | --- | --- | --- | --- | --- | --- |
| Sjovall | 2017 | Combination of antibiotics | One antibiotic | Sepsis | All-cause mortality | 7 | 1 | 0.92 | 1.02 [0.66; 1.58] | 1.18 [0.92; 1.52] | 1.16 [0.81; 1.66] |
| Barrington | 2017 | Nitric oxide | Placebo or no intervention | Respiratory failure neonates | Death before hospital discharge | 3 | 6 | 0.96 | 1.02 [0.44; 2.38] | 0.97 [0.49; 1.94] | 0.95 [0.58; 1.55] |
| Barrington | 2017 | Nitric oxide | Placebo or no intervention | Respiratory failure preterm | Death before hospital discharge | 9 | 4 | 0.50 | 1.2 [0.71; 2.04] | 1.05 [0.82; 1.36] | 0.88 [0.55; 1.4] |
| Gebistorf | 2016 | Nitric oxide | Placebo or no intervention | ARDS child and adult | Overall mortality | 4 | 5 | 0.95 | 0.98 [0.56; 1.71] | 1.04 [0.71; 1.52] | 1.06 [0.71; 1.58] |
| Sud | 2016 | High frequency oscillatory ventilation | Conventional or pressure controlled ventilation | ARDS | Hospital or 30-day mortality | 4 | 3 | 0.21 | 2.48 [0.61; 10.19] | 1.03 [0.55; 1.94] | 0.41 [0.12; 1.46] |
| Beitland | 2015 | Low molecular heparin | Unfractionated heparin | Adult ICU patients | Any deep vein thrombosis | 2 | 1 | 0.81 | 0.9 [0.37; 2.17] | 0.76 [0.33; 1.77] | 0.85 [0.67; 1.07] |
| Kuriyama | 2015 | Closed tracheal suctioning systems | Open tracheal suctioning systems | Mechanical ventilated adults | Incidence of ventilator-associated pneumonia | 2 | 3 | 0.29 | 2.69 [0.43; 16.72] | 0.64 [0.34; 1.19] | 0.24 [0.04; 1.31] |
| Siempos | 2015 | Early tracheostomy | Late tracheostomy | Mechanical ventilated | Mortality | 1 | 6 | 0.01 | 0.35 [0.15; 0.81] | 0.29 [0.14; 0.61] | 0.82 [0.58; 1.16] |
| Aitken | 2015 | Protocol-directed sedation | Non-protocol-directed sedation | Mechanical ventilated | Hospital mortality | 1 | 1 | 0.21 | 1.56 [0.78; 3.15] | 1.21 [0.72; 2.04] | 0.78 [0.49; 1.24] |
| Porhomayon | 2015 | Light sedation | Heavy or standard sedation | ICU survivors | Delirium | 2 | 5 | 0.75 | 1.26 [0.32; 4.99] | 1.02 [0.33; 3.18] | 0.81 [0.37; 1.77] |
| Shah | 2017 | Corticosteroids | Placebo or no intervention | Chronic lung disorders in infants | Chronic lung disease at 36 wks post-menstrual age (among survivors) | 2 | 2 | 0.39 | 0.74 [0.38; 1.46] | 0.62 [0.46; 0.85] | 0.83 [0.46; 1.53] |
| Liberati | 2009 | Antibiotic | No prophylaxis | Adult ICU patients | Mortality | 9 | 2 | 0.51 | 0.73 [0.29; 1.83] | 0.83 [0.69; 1] | 1.13 [0.46; 2.78] |
| Bellu | 2008 | Opioids | Placebo or no intervention | Mechanical ventilated infants | Neonatal mortality | 1 | 3 | 0.21 | 0.13 [0.01; 3.03] | 0.16 [0.01; 3.51] | 1.19 [0.81; 1.73] |
| Adhikari | 2004 | Prostaglandin, N-acetylcysteine, or Surfactant | Placebo or no intervention | Acute lung injury and ARDS in adults | Mortality (early, all cause) | 10 | 1 | 0.16 | 0.15 | 0.5 [0.2; 1.28] | 0.96 [0.77; 1.2] |
| Zhang | 2017 | N-acetylcysteine | Placebo | ARDS | Short term mortality | 3 | 1 | 0.10 | 4.82 [0.76; 30.69] | 0.8 [0.38; 1.71] | 0.17 [0.03; 0.9] |
| Gillies | 2017 | Heated humidifiers | Heat and moisture exchangers | Mechanical ventilated adults | Artificial airway occlusion | 1 | 1 | 0.86 | 0.72 [0.02; 28.28] | 5.14 [0.59; 44.43] | 7.15 [0.37; 139.77] |
| Serpa | 2017 | Balanced saline | Isotonic saline | Resuscitation in adults | In hospital mortality | 2 | 1 | 0.92 | 0.87 [0.05; 14.75] | 0.87 [0.65; 1.17] | 1 [0.06; 16.69] |
| Putzu | 2017 | Continuous veno-venous hemofiltration | No intervention | ARD and sepsis in adults | Mortality at longest follow-up | 2 | 2 | 0.95 | 0.87 [0.02; 42.85] | 0.27 [0.01; 11.97] | 0.31 [0.13; 0.76] |
| Osadnik | 2017 | Non-invasive ventilation | Usual care | Acute hypercapnic respiratory failure COPD adults | Endotracheal intubation | 1 | 9 | 0.16 | 0.17 [0.02; 1.96] | 0.05 [0; 0.54] | 0.29 [0.19; 0.43] |
| Sole-Lleonart | 2017 | Nebulized antibiotics | Intravenous antibiotics | Mechanical ventilated | Nephrotoxicity | 1 | 1 | 0.07 | 0.05 [0; 1.21] | 0.06 [0; 1.24] | 1.18 [0.47; 2.97] |
| Nagendran | 2017 | Statins | Placebo | ARDS | 28 day mortality | 1 | 4 | 0.91 | 1.04 [0.58; 1.84] | 1.11 [0.79; 1.56] | 1.07 [0.67; 1.71] |
| Wang | 2017 | Levosimendan | Acitve/placebo/no | Septic shock | Mortality | 1 | 4 | 0.04 | 2.54 [1.06; 6.07] | 1.23 [0.86; 1.77] | 0.49 [0.22; 1.07] |
| Fujii | 2018 | Polymyxin B‑immobilized hemoperfusion | No intervention | Sepsis and septic shock | 28 day mortality | 4 | 1 | 0.56 | 1.93 [0.21; 17.34] | 1.07 [0.68; 1.7] | 0.56 [0.06; 4.76] |
| Bednarczyk | 2017 | Dynamic assessment | No intervention | Fluid resuscitation | Mortality | 4 | 5 | 0.68 | 1.23 [0.46; 3.31] | 0.65 [0.27; 1.58] | 0.53 [0.34; 0.81] |
| Lu | 2017 | Omega-3 | Placebo/no | Sepsis | Mortality | 6 | 3 | 0.71 | 1.25 [0.39; 3.99] | 0.87 [0.52; 1.48] | 0.7 [0.25; 1.98] |
| Andriolo | 2017 | Procalcitonin-guided algorithm | No intervention | Sepsis | Mortality at longest follow-up | 3 | 1 | 0.69 | 1.21 [0.47; 3.09] | 1.03 [0.65; 1.65] | 0.86 [0.38; 1.94] |
| Liu | 2017 | Ulinastatin combined with thymosin alpha2 | Placebo/no | Sepsis | 28 day mortality | 1 | 1 | 0.61 | 0.69 [0.17; 2.85] | 0.31 [0.09; 1.02] | 0.45 [0.21; 0.95] |
| Moeller | 2016 | Gelatin | Active | Resuscitation | Mortality | 4 | 3 | 0.75 | 0.81 [0.23; 2.86] | 1.4 [0.83; 2.37] | 1.72 [0.55; 5.38] |
| Roberts | 2016 | Continuous beta-lactam | Active | Severe sepsis | Hospital mortality | 1 | 2 | 0.51 | 1.31 [0.59; 2.92] | 0.73 [0.46; 1.16] | 0.56 [0.29; 1.07] |
| Umemura | 2016 | Anticoagulants | Placebo/no | Sepsis | Mortality | 9 | 7 | 0.87 | 1.03 [0.75; 1.41] | 0.96 [0.87; 1.07] | 0.94 [0.7; 1.26] |
| Busani | 2016 | Polyclonal intravenous immunoglobulin | Active/no | Septic shock | Mortality | 6 | 2 | 0.29 | 3.8 [0.32; 45.2] | 0.91 [0.65; 1.27] | 0.24 [0.02; 2.77] |
| Volbeda | 2015 | Glucocorticosteroids | Placebo/no | Sepsis | Mortality | 8 | 10 | 0.04 | 1.49 [1.02; 2.17] | 1.12 [0.86; 1.46] | 0.75 [0.57; 0.99] |
| Zhang | 2015 | Antipyretic therapy | Placebo/no | Sepsis | Mortality | 2 | 2 | 0.75 | 1.45 [0.15; 14.47] | 0.96 [0.11; 8.64] | 0.66 [0.34; 1.3] |

1. **Excluding trials supplied by the industry and trials with both arms with an SMI (RORs and sROR)**


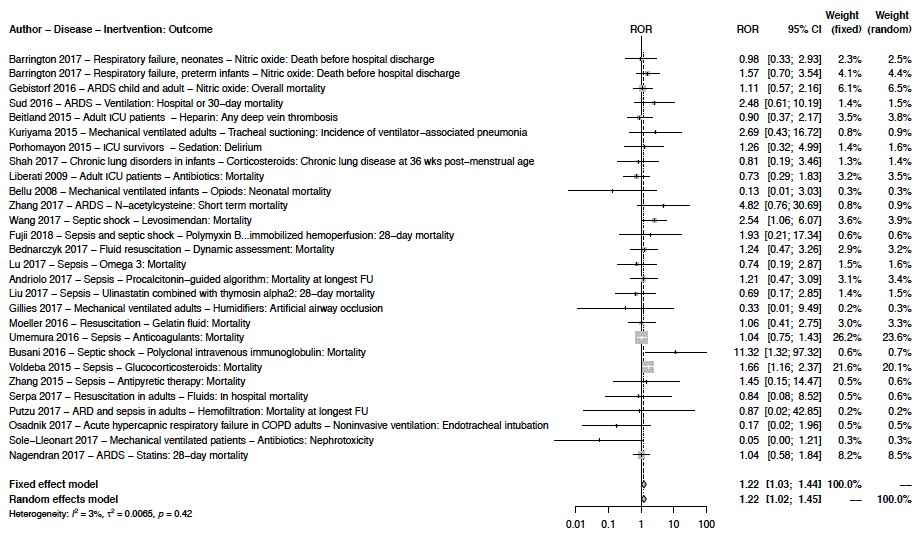


| **Author** | **Year** | **Disease** | **SMI** | **Control** | **OUTCOME** | **Trials with** | **Trials without** | **ROR p-val** | **ROR** | **OR with** | **OR without** |
| --- | --- | --- | --- | --- | --- | --- | --- | --- | --- | --- | --- |
| Barrington | 2017 | Nitric oxide | Nitric oxide | Placebo or no intervention | Respiratory failure neonates | 3 | 4 | 0.97 | 0.98 [0.33; 2.93] | 0.97 [0.49; 1.94] | 1 [0.43; 2.34] |
| Barrington | 2017 | Nitric oxide | Nitric oxide | Placebo or no intervention | Respiratory failure preterm | 9 | 1 | 0.28 | 1.57 [0.7; 3.54] | 1.05 [0.82; 1.36] | 0.67 [0.31; 1.45] |
| Gebistorf | 2016 | Nitric oxide | Nitric oxide | Placebo or no intervention | ARDS child and adult | 5 | 4 | 0.76 | 1.11 [0.57; 2.16] | 1.06 [0.77; 1.45] | 0.95 [0.53; 1.72] |
| Sud | 2016 | Ventilation | High frequency oscillatory ventilation | Conventional or pressure controlled ventilation | ARDS | 4 | 3 | 0.21 | 2.48 [0.61; 10.19] | 1.03 [0.55; 1.94] | 0.41 [0.12; 1.46] |
| Beitland | 2015 | Heparin | Low molecular heparin | Unfractionated heparin | Adult ICU patients | 2 | 1 | 0.81 | 0.9 [0.37; 2.17] | 0.76 [0.33; 1.77] | 0.85 [0.67; 1.07] |
| Kuriyama | 2015 | Suctioning | Closed tracheal suctioning systems | Open tracheal suctioning systems | Mechanical ventilated adults | 2 | 3 | 0.29 | 2.69 [0.43; 16.72] | 0.64 [0.34; 1.19] | 0.24 [0.04; 1.31] |
| Porhomayon | 2015 | Sedation | Light sedation | Heavy or standard sedation | ICU survivors | 2 | 5 | 0.75 | 1.26 [0.32; 4.99] | 1.02 [0.33; 3.18] | 0.81 [0.37; 1.77] |
| Shah | 2017 | Corticosteroids | Corticosteroids | Placebo or no intervention | Chronic lung disorders in infants | 2 | 1 | 0.77 | 0.81 [0.19; 3.47] | 0.62 [0.46; 0.85] | 0.77 [0.19; 3.2] |
| Liberati | 2009 | Antibiotic | Antibiotic | No prophylaxis | Adult ICU patients | 9 | 2 | 0.51 | 0.73 [0.29; 1.83] | 0.83 [0.69; 1] | 1.13 [0.46; 2.78] |
| Bellu | 2008 | Opioids | Opioids | Placebo or no intervention | Mechanical ventilated infants | 1 | 3 | 0.21 | 0.13 [0.01; 3.03] | 0.16 [0.01; 3.51] | 1.19 [0.81; 1.73] |
| Zhang | 2017 | N-acetylcysteine | N-acetylcysteine | Placebo | ARDS | 3 | 1 | 0.10 | 4.82 [0.76; 30.69] | 0.8 [0.38; 1.71] | 0.17 [0.03; 0.9] |
| Gillies | 2017 | Humidifiers | Heated humidifiers | Heat and moisture exchangers | Mechanical ventilated adults | 4 | 1 | 0.52 | 3.01 [0.1; 86.53] | 0.42 [0.09; 2.01] | 0.14 [0.01; 2.73] |
| Serpa | 2017 | Fluids | Balanced saline | Isotonic saline | Resuscitation in adults | 2 | 2 | 0.88 | 0.84 [0.08; 8.52] | 0.87 [0.65; 1.17] | 1.03 [0.1; 10.26] |
| Putzu | 2017 | Hemofiltration | Continuous veno-venous hemofiltration | No intervention | ARD and sepsis in adults | 2 | 2 | 0.95 | 0.87 [0.02; 42.85] | 0.27 [0.01; 11.97] | 0.31 [0.13; 0.76] |
| Osadnik | 2017 | Noninvasive ventilation | Non-invasive ventilation | Usual care | Acute hypercapnic respiratory failure COPD adults | 1 | 9 | 0.16 | 0.17 [0.02; 1.96] | 0.05 [0; 0.54] | 0.29 [0.19; 0.43] |
| Sole-Lleonart | 2017 | Antibiotic | Nebulized antibiotics | Intravenous antibiotics | Mechanical ventilated | 1 | 1 | 0.07 | 0.05 [0; 1.21] | 0.06 [0; 1.24] | 1.18 [0.47; 2.97] |
| Nagendran | 2017 | Statin | Statins | Placebo | ARDS | 1 | 4 | 0.91 | 1.04 [0.58; 1.84] | 1.11 [0.79; 1.56] | 1.07 [0.67; 1.71] |
| Wang | 2017 | Levosimendan | Acitve/placebo/no | Septic shock | Mortality | 6 | 2 | 0.04 | 2.54 [1.06; 6.07] | 1.23 [0.86; 1.77] | 0.49 [0.22; 1.07] |
| Fujii | 2018 | Polymyxin B‑immobilized hemoperfusion | No intervention | Sepsis and septic shock | 28 day mortality | 3 | 1 | 0.56 | 1.93 [0.21; 17.34] | 1.07 [0.68; 1.7] | 0.56 [0.06; 4.76] |
| Bednarczyk | 2017 | Dynamic assessment | No intervention | Fluid resuscitation | Mortality | 1 | 1 | 0.66 | 1.24 [0.47; 3.26] | 0.66 [0.28; 1.58] | 0.53 [0.35; 0.82] |
| Lu | 2017 | Omega-3 | Placebo/no | Sepsis | Mortality | 4 | 1 | 0.66 | 0.74 [0.19; 2.87] | 0.87 [0.52; 1.48] | 1.18 [0.34; 4.16] |
| Andriolo | 2017 | Procalcitonin-guided algorithm | No intervention | Sepsis | Mortality at longest follow-up | 2 | 5 | 0.69 | 1.21 [0.47; 3.09] | 1.03 [0.65; 1.65] | 0.86 [0.38; 1.94] |
| Liu | 2017 |  | Placebo/no | Sepsis | 28 day mortality | 9 | 6 | 0.61 | 0.69 [0.17; 2.85] | 0.31 [0.09; 1.02] | 0.45 [0.21; 0.95] |
| Moeller | 2016 | Gelatin | Active | Resuscitation | Mortality | 8 | 9 | 0.90 | 1.06 [0.41; 2.75] | 1.41 [0.58; 3.42] | 1.32 [0.94; 1.87] |
| Umemura | 2016 | Anticoagulants | Placebo/no | Sepsis | Mortality | 2 | 2 | 0.83 | 1.04 [0.75; 1.43] | 0.96 [0.87; 1.07] | 0.93 [0.68; 1.26] |
| Busani | 2016 | Polyclonal intravenous immunoglobulin | Active/no | Septic shock | Mortality | 2 | 2 | 0.03 | 11.32 [1.32; 97.32] | 0.91 [0.65; 1.27] | 0.08 [0.01; 0.67] |
| Volbeda | 2015 | Glucocorticosteroids | Placebo/no | Sepsis | Mortality | 2 | 2 | 0.01 | 1.66 [1.16; 2.37] | 1.12 [0.86; 1.46] | 0.68 [0.53; 0.86] |
| Zhang | 2015 | Antipyretic therapy | Placebo/no | Sepsis | Mortality | 1 | 9 | 0.75 | 1.45 [0.15; 14.47] | 0.96 [0.11; 8.64] | 0.66 [0.34; 1.3] |

**e-Tables and e-Figures 4: Forest plots, ROR and sROR of secondary analyses**

1. **Forest plot not reported versus with industry funding** **(RORs and sROR)**

**
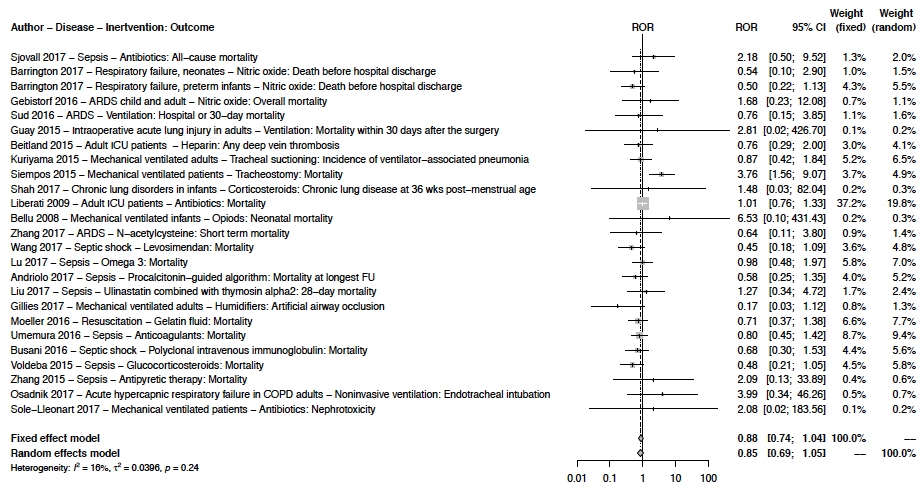
**

| **Author** | **Year** | **Disease** | **SMI** | **Control** | **OUTCOME** | **Trials with** | **NR** | **ROR p-val** | **ROR** | **OR with** | **OR without** |
| --- | --- | --- | --- | --- | --- | --- | --- | --- | --- | --- | --- |
| Sjovall | 2017 | Combination of antibiotics | One antibiotic | Sepsis | All-cause mortality | 7 | 2 | 0.30 | 2.18 [0.5; 9.52] | 2.58 [0.6; 11.02] | 1.18 [0.92; 1.52] |
| Barrington | 2017 | Nitric oxide | Placebo or no intervention | Respiratory failure neonates | Death before hospital discharge | 3 | 1 | 0.47 | 0.54 [0.1; 2.9] | 0.53 [0.11; 2.43] | 0.97 [0.49; 1.94] |
| Barrington | 2017 | Nitric oxide | Placebo or no intervention | Respiratory failure preterm | Death before hospital discharge | 9 | 4 | 0.10 | 0.5 [0.22; 1.14] | 0.53 [0.24; 1.15] | 1.05 [0.82; 1.36] |
| Gebistorf | 2016 | Nitric oxide | Placebo or no intervention | ARDS child and adult | Overall mortality | 5 | 1 | 0.61 | 1.68 [0.23; 12.08] | 1.78 [0.25; 12.45] | 1.06 [0.77; 1.45] |
| Sud | 2016 | High frequency oscillatory ventilation | Conventional or pressure controlled ventilation | ARDS | Hospital or 30-day mortality | 4 | 1 | 0.74 | 0.76 [0.15; 3.85] | 0.78 [0.17; 3.49] | 1.03 [0.55; 1.94] |
| Guay | 2015 | Low tidal volume ventilation | High tidal volume ventilation | Intraoperative acute lung injury in adults | Mortality within 30 days after the surgery | 1 | 1 | 0.69 | 2.81 [0.02; 426.74] | 5.35 [0.25; 116.31] | 1.9 [0.04; 100.63] |
| Beitland | 2015 | Low molecular heparin | Unfractionated heparin | Adult ICU patients | Any deep vein thrombosis | 2 | 4 | 0.57 | 0.76 [0.29; 2] | 0.58 [0.36; 0.93] | 0.76 [0.33; 1.77] |
| Kuriyama | 2015 | Closed tracheal suctioning systems | Open tracheal suctioning systems | Mechanical ventilated adults | Incidence of ventilator-associated pneumonia | 2 | 11 | 0.72 | 0.87 [0.42; 1.84] | 0.56 [0.37; 0.83] | 0.64 [0.34; 1.19] |
| Siempos | 2015 | Early tracheostomy | Late tracheostomy | Mechanical ventilated | Mortality | 1 | 6 | 0.00 | 3.76 [1.56; 9.07] | 1.08 [0.69; 1.71] | 0.29 [0.14; 0.61] |
| Shah | 2017 | Corticosteroids | Placebo or no intervention | Chronic lung disorders in infants | chronic lung disease at 36 wks post-menstrual age (among survivors) | 2 | 1 | 0.85 | 1.48 [0.03; 82.05] | 0.92 [0.02; 50.28] | 0.62 [0.46; 0.85] |
| Liberati | 2009 | Antibiotic | No prophylaxis | Adult ICU patients | Mortality | 9 | 9 | 0.96 | 1.01 [0.76; 1.33] | 0.84 [0.68; 1.03] | 0.83 [0.69; 1] |
| Bellu | 2008 | Opioids | Placebo or no intervention | Mechanical ventilated infants | Neonatal mortality | 1 | 1 | 0.38 | 6.53 [0.1; 431.46] | 1.04 [0.06; 17.55] | 0.16 [0.01; 3.51] |
| Zhang | 2017 | N-acetylcysteine | Placebo | ARDS | Short term mortality | 3 | 1 | 0.62 | 0.64 [0.11; 3.8] | 0.51 [0.1; 2.59] | 0.8 [0.38; 1.71] |
| Gillies | 2017 | Heated humidifiers | Heat and moisture exchangers | Mechanical ventilated adults | Artificial airway occlusion | 5 | 9 | 0.07 | 0.18 [0.03; 1.15] | 0.36 [0.11; 1.16] | 2.04 [0.48; 8.72] |
| Osadnik | 2017 | Non-invasive ventilation | Usual care | Acute hypercapnic respiratory failure COPD adults | Endotracheal intubation | 1 | 6 | 0.27 | 3.99 [0.34; 46.26] | 0.2 [0.11; 0.36] | 0.05 [0; 0.54] |
| Sole-Lleonart | 2017 | Nebulized antibiotics | Intravenous antibiotics | Mechanical ventilated | Nephrotoxicity | 1 | 1 | 0.75 | 2.08 [0.02; 183.58] | 0.13 [0; 3.52] | 0.06 [0; 1.24] |
| Wang | 2017 | Levosimendan | Acitve/placebo/no | Septic shock | Mortality | 1 | 3 | 0.08 | 0.45 [0.18; 1.09] | 0.55 [0.24; 1.25] | 1.23 [0.86; 1.77] |
| Lu | 2017 | Omega-3 | Placebo/no | Sepsis | Mortality | 6 | 8 | 0.95 | 0.98 [0.48; 1.97] | 0.85 [0.53; 1.36] | 0.87 [0.52; 1.48] |
| Andriolo | 2017 | Procalcitonin-guided algorithm | No intervention | Sepsis | Mortality at longest follow-up | 3 | 4 | 0.21 | 0.58 [0.25; 1.35] | 0.6 [0.3; 1.22] | 1.03 [0.65; 1.65] |
| Liu | 2017 | Ulinastatin combined with thymosin alpha2 | Placebo/no | Sepsis | 28 day mortality | 1 | 3 | 0.72 | 1.27 [0.34; 4.72] | 0.39 [0.23; 0.67] | 0.31 [0.09; 1.02] |
| Moeller | 2016 | Gelatin | Active | Resuscitation | Mortality | 4 | 7 | 0.32 | 0.71 [0.37; 1.38] | 1 [0.67; 1.49] | 1.4 [0.83; 2.37] |
| Umemura | 2016 | Anticoagulants | Placebo/no | Sepsis | Mortality | 9 | 4 | 0.45 | 0.8 [0.45; 1.42] | 0.77 [0.44; 1.35] | 0.96 [0.87; 1.07] |
| Busani | 2016 | Polyclonal intravenous immunoglobulin | Active/no | Septic shock | Mortality | 6 | 3 | 0.35 | 0.68 [0.3; 1.53] | 0.62 [0.3; 1.29] | 0.91 [0.65; 1.27] |
| Volbeda | 2015 | Glucocorticosteroids | Placebo/no | Sepsis | Mortality | 8 | 11 | 0.07 | 0.48 [0.21; 1.05] | 0.53 [0.25; 1.13] | 1.12 [0.86; 1.46] |
| Zhang | 2015 | Antipyretic therapy | Placebo/no | Sepsis | Mortality | 2 | 2 | 0.60 | 2.09 [0.13; 33.89] | 2.01 [0.36; 11.16] | 0.96 [0.11; 8.64] |

1. **Forest plot not reported versus without industry funding** **(RORs and sROR)**


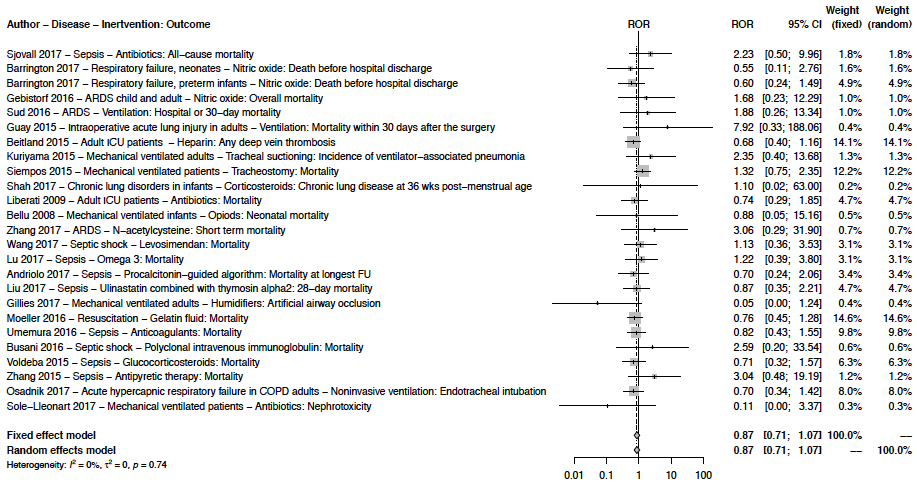


| **Author** | **Year** | **Disease** | **SMI** | **Control** | **OUTCOME** | **Trials without** | **NR** | **ROR p-val** | **ROR** | **OR with** | **OR without** |
| --- | --- | --- | --- | --- | --- | --- | --- | --- | --- | --- | --- |
| Sjovall | 2017 | Combination of antibiotics | One antibiotic | Sepsis | All-cause mortality | 1 | 2 | 0.29 | 2.23 [0.5; 9.96] | 2.58 [0.6; 11.02] | 1.16 [0.81; 1.66] |
| Barrington | 2017 | Nitric oxide | Placebo or no intervention | Respiratory failure neonates | Death before hospital discharge | 6 | 1 | 0.47 | 0.55 [0.11; 2.76] | 0.53 [0.11; 2.43] | 0.95 [0.58; 1.55] |
| Barrington | 2017 | Nitric oxide | Placebo or no intervention | Respiratory failure preterm | Death before hospital discharge | 4 | 4 | 0.27 | 0.6 [0.24; 1.49] | 0.53 [0.24; 1.15] | 0.88 [0.55; 1.4] |
| Gebistorf | 2016 | Nitric oxide | Placebo or no intervention | ARDS child and adult | Overall mortality | 5 | 1 | 0.61 | 1.68 [0.23; 12.29] | 1.78 [0.25; 12.45] | 1.06 [0.71; 1.58] |
| Sud | 2016 | High frequency oscillatory ventilation | Conventional or pressure controlled ventilation | ARDS | Hospital or 30-day mortality | 3 | 1 | 0.53 | 1.88 [0.26; 13.35] | 0.78 [0.17; 3.49] | 0.41 [0.12; 1.46] |
| Guay | 2015 | Low tidal volume ventilation | High tidal volume ventilation | Intraoperative acute lung injury in adults | Mortality within 30 days after the surgery | 7 | 1 | 0.20 | 7.92 [0.33; 188.07] | 5.35 [0.25; 116.31] | 0.68 [0.32; 1.42] |
| Beitland | 2015 | Low molecular heparin | Unfractionated heparin | Adult ICU patients | Any deep vein thrombosis | 1 | 4 | 0.16 | 0.68 [0.4; 1.16] | 0.58 [0.36; 0.93] | 0.85 [0.67; 1.07] |
| Kuriyama | 2015 | Closed tracheal suctioning systems | Open tracheal suctioning systems | Mechanical ventilated adults | Incidence of ventilator-associated pneumonia | 3 | 11 | 0.34 | 2.35 [0.4; 13.68] | 0.56 [0.37; 0.83] | 0.24 [0.04; 1.31] |
| Siempos | 2015 | Early tracheostomy | Late tracheostomy | Mechanical ventilated | Mortality | 6 | 6 | 0.34 | 1.32 [0.75; 2.35] | 1.08 [0.69; 1.71] | 0.82 [0.58; 1.16] |
| Shah | 2017 | Corticosteroids | Placebo or no intervention | Chronic lung disorders in infants | Chronic lung disease at 36 wks post-menstrual age (among survivors) | 2 | 1 | 0.96 | 1.1 [0.02; 63] | 0.92 [0.02; 50.28] | 0.83 [0.46; 1.53] |
| Liberati | 2009 | Antibiotic | No prophylaxis | Adult ICU patients | Mortality | 2 | 9 | 0.52 | 0.74 [0.29; 1.85] | 0.84 [0.68; 1.03] | 1.13 [0.46; 2.78] |
| Bellu | 2008 | Opioids | Placebo or no intervention | Mechanical ventilated infants | Neonatal mortality | 3 | 1 | 0.93 | 0.88 [0.05; 15.16] | 1.04 [0.06; 17.55] | 1.19 [0.81; 1.73] |
| Zhang | 2017 | N-acetylcysteine | Placebo | ARDS | Short term mortality | 1 | 1 | 0.35 | 3.06 [0.29; 31.91] | 0.51 [0.1; 2.59] | 0.17 [0.03; 0.9] |
| Gillies | 2017 | Heated humidifiers | Heat and moisture exchangers | Mechanical ventilated adults | Artificial airway occlusion | 1 | 9 | 0.07 | 0.05 [0; 1.24] | 0.36 [0.11; 1.16] | 7.15 [0.37; 139.77] |
| Osadnik | 2017 | Non-invasive ventilation | Usual care | Acute hypercapnic respiratory failure COPD adults | Endotracheal intubation | 9 | 6 | 0.32 | 0.7 [0.34; 1.42] | 0.2 [0.11; 0.36] | 0.29 [0.19; 0.43] |
| Sole-Lleonart | 2017 | Nebulized antibiotics | Intravenous antibiotics | Mechanical ventilated | Nephrotoxicity | 1 | 1 | 0.20 | 0.11 [0; 3.37] | 0.13 [0; 3.52] | 1.18 [0.47; 2.97] |
| Wang | 2017 | Levosimendan | Acitve/placebo/no | Septic shock | Mortality | 4 | 3 | 0.83 | 1.13 [0.36; 3.53] | 0.55 [0.24; 1.25] | 0.49 [0.22; 1.07] |
| Lu | 2017 | Omega-3 | Placebo/no | Sepsis | Mortality | 3 | 8 | 0.74 | 1.22 [0.39; 3.81] | 0.85 [0.53; 1.36] | 0.7 [0.25; 1.98] |
| Andriolo | 2017 | Procalcitonin-guided algorithm | No intervention | Sepsis | Mortality at longest follow-up | 1 | 4 | 0.52 | 0.7 [0.24; 2.06] | 0.6 [0.3; 1.22] | 0.86 [0.38; 1.94] |
| Liu | 2017 | Ulinastatin combined with thymosin alpha2 | Placebo/no | Sepsis | 28 day mortality | 1 | 3 | 0.78 | 0.87 [0.35; 2.21] | 0.39 [0.23; 0.67] | 0.45 [0.21; 0.95] |
| Moeller | 2016 | Gelatin | Active | Resuscitation | Mortality | 5 | 7 | 0.29 | 0.76 [0.45; 1.28] | 1 [0.67; 1.49] | 1.32 [0.94; 1.87] |
| Umemura | 2016 | Anticoagulants | Placebo/no | Sepsis | Mortality | 7 | 4 | 0.54 | 0.82 [0.43; 1.55] | 0.77 [0.44; 1.35] | 0.94 [0.7; 1.26] |
| Busani | 2016 | Polyclonal intravenous immunoglobulin | Active/no | Septic shock | Mortality | 2 | 3 | 0.47 | 2.59 [0.2; 33.54] | 0.62 [0.3; 1.29] | 0.24 [0.02; 2.77] |
| Volbeda | 2015 | Glucocorticosteroids | Placebo/no | Sepsis | Mortality | 10 | 11 | 0.40 | 0.71 [0.32; 1.57] | 0.53 [0.25; 1.13] | 0.75 [0.57; 0.99] |
| Zhang | 2015 | Antipyretic therapy | Placebo/no | Sepsis | Mortality | 2 | 2 | 0.24 | 3.04 [0.48; 19.19] | 2.01 [0.36; 11.16] | 0.66 [0.34; 1.3] |

1. **Forest plot not reported and with industry funding versus without**


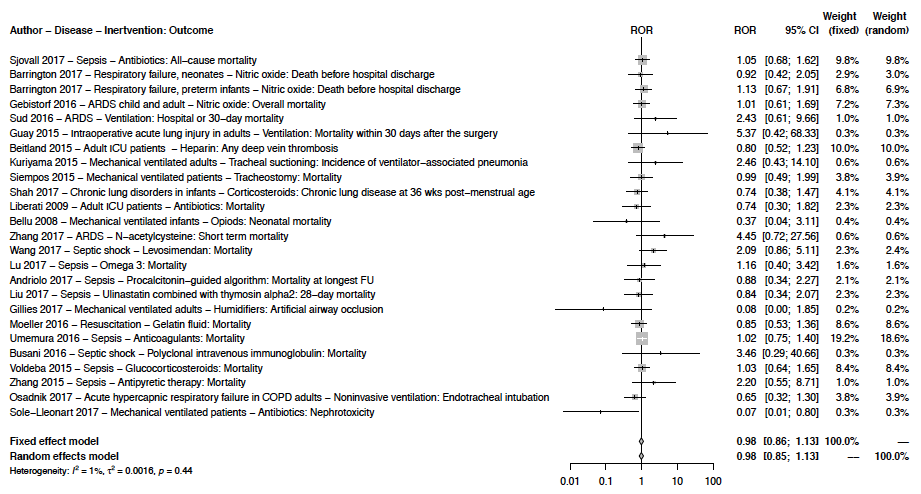


| **Author** | **Year** | **Disease** | **SMI** | **Control** | **OUTCOME** | **NR and with** | **Without** | **ROR p-val** | **ROR** | **OR with** | **OR without** |
| --- | --- | --- | --- | --- | --- | --- | --- | --- | --- | --- | --- |
| Sjovall | 2017 | Combination of antibiotics | One antibiotic | Sepsis | All-cause mortality | 9 | 1 | 0.84 | 1.05 [0.68; 1.62] | 1.21 [0.94; 1.55] | 1.16 [0.81; 1.66] |
| Barrington | 2017 | Nitric oxide | Placebo or no intervention | Respiratory failure neonates | Death before hospital discharge | 4 | 6 | 0.84 | 0.92 [0.42; 2.05] | 0.88 [0.47; 1.65] | 0.95 [0.58; 1.55] |
| Barrington | 2017 | Nitric oxide | Placebo or no intervention | Respiratory failure preterm | Death before hospital discharge | 13 | 4 | 0.64 | 1.13 [0.67; 1.91] | 1 [0.79; 1.26] | 0.88 [0.55; 1.4] |
| Gebistorf | 2016 | Nitric oxide | Placebo or no intervention | ARDS child and adult | Overall mortality | 6 | 5 | 0.96 | 1.01 [0.61; 1.69] | 1.07 [0.79; 1.46] | 1.06 [0.71; 1.58] |
| Sud | 2016 | High frequency oscillatory ventilation | Conventional or pressure controlled ventilation | ARDS | Hospital or 30-day mortality | 5 | 3 | 0.21 | 2.43 [0.61; 9.66] | 1.01 [0.57; 1.76] | 0.41 [0.12; 1.46] |
| Guay | 2015 | Low tidal volume ventilation | High tidal volume ventilation | Intraoperative acute lung injury in adults | Mortality within 30 days after the surgery | 2 | 7 | 0.20 | 5.37 [0.42; 68.33] | 3.63 [0.32; 41.32] | 0.68 [0.32; 1.42] |
| Beitland | 2015 | Low molecular heparin | Unfractionated heparin | Adult ICU patients | Any deep vein thrombosis | 6 | 1 | 0.31 | 0.8 [0.52; 1.23] | 0.68 [0.47; 0.97] | 0.85 [0.67; 1.07] |
| Kuriyama | 2015 | Closed tracheal suctioning systems | Open tracheal suctioning systems | Mechanical ventilated adults | Incidence of ventilator-associated pneumonia | 13 | 3 | 0.31 | 2.46 [0.43; 14.1] | 0.58 [0.42; 0.81] | 0.24 [0.04; 1.31] |
| Siempos | 2015 | Early tracheostomy | Late tracheostomy | Mechanical ventilated | Mortality | 7 | 6 | 0.98 | 0.99 [0.49; 1.99] | 0.81 [0.44; 1.49] | 0.82 [0.58; 1.16] |
| Shah | 2017 | Corticosteroids | Placebo or no intervention | Chronic lung disorders in infants | chronic lung disease at 36 wks post-menstrual age (among survivors) | 3 | 2 | 0.39 | 0.74 [0.38; 1.47] | 0.62 [0.46; 0.85] | 0.83 [0.46; 1.53] |
| Liberati | 2009 | Antibiotic | No prophylaxis | Adult ICU patients | Mortality | 18 | 2 | 0.51 | 0.74 [0.3; 1.82] | 0.83 [0.73; 0.95] | 1.13 [0.46; 2.78] |
| Bellu | 2008 | Opioids | Placebo or no intervention | Mechanical ventilated infants | Neonatal mortality | 2 | 3 | 0.36 | 0.37 [0.04; 3.11] | 0.44 [0.05; 3.57] | 1.19 [0.81; 1.73] |
| Zhang | 2017 | N-acetylcysteine | Placebo | ARDS | Short term mortality | 4 | 1 | 0.11 | 4.45 [0.72; 27.56] | 0.74 [0.37; 1.47] | 0.17 [0.03; 0.9] |
| Gillies | 2017 | Heated humidifiers | Heat and moisture exchangers | Mechanical ventilated adults | Artificial airway occlusion | 14 | 1 | 0.12 | 0.08 [0; 1.84] | 0.59 [0.25; 1.42] | 7.15 [0.37; 139.77] |
| Osadnik | 2017 | Non-invasive ventilation | Usual care | Acute hypercapnic respiratory failure COPD adults | Endotracheal intubation | 7 | 9 | 0.22 | 0.65 [0.32; 1.3] | 0.18 [0.11; 0.32] | 0.29 [0.19; 0.43] |
| Sole-Lleonart | 2017 | Nebulized antibiotics | Intravenous antibiotics | Mechanical ventilated | Nephrotoxicity | 2 | 1 | 0.03 | 0.07 [0.01; 0.8] | 0.09 [0.01; 0.79] | 1.18 [0.47; 2.97] |
| Wang | 2017 | Levosimendan | Acitve/placebo/no | Eptic shock | Mortality | 4 | 4 | 0.10 | 2.09 [0.86; 5.11] | 1.02 [0.68; 1.53] | 0.49 [0.22; 1.07] |
| Lu | 2017 | Omega-3 | Placebo/no | Sepsis | Mortality | 14 | 3 | 0.78 | 1.16 [0.4; 3.42] | 0.82 [0.61; 1.08] | 0.7 [0.25; 1.98] |
| Andriolo | 2017 | Procalcitonin-guided algorithm | No intervention | Sepsis | Mortality at longest follow-up | 7 | 1 | 0.79 | 0.88 [0.34; 2.27] | 0.75 [0.47; 1.22] | 0.86 [0.38; 1.94] |
| Liu | 2017 | Ulinastatin combined with thymosin alpha2 | Placebo/no | Sepsis | 28 day mortality | 4 | 1 | 0.70 | 0.84 [0.34; 2.07] | 0.37 [0.23; 0.61] | 0.45 [0.21; 0.95] |
| Moeller | 2016 | Gelatin | Active | Resuscitation | Mortality | 11 | 5 | 0.50 | 0.85 [0.53; 1.36] | 1.13 [0.82; 1.55] | 1.32 [0.94; 1.87] |
| Umemura | 2016 | Anticoagulants | Placebo/no | Sepsis | Mortality | 13 | 7 | 0.88 | 1.02 [0.75; 1.4] | 0.96 [0.87; 1.05] | 0.94 [0.7; 1.26] |
| Busani | 2016 | Polyclonal intravenous immunoglobulin | Active/no | Septic shock | Mortality | 9 | 2 | 0.32 | 3.46 [0.29; 40.66] | 0.9 [0.7; 1.17] | 0.24 [0.02; 2.77] |
| Volbeda | 2015 | Glucocorticosteroids | Placebo/no | Sepsis | Mortality | 19 | 10 | 0.90 | 1.03 [0.64; 1.65] | 0.78 [0.53; 1.14] | 0.75 [0.57; 0.99] |
| Zhang | 2015 | Antipyretic therapy | Placebo/no | Sepsis | Mortality | 4 | 2 | 0.26 | 2.2 [0.55; 8.71] | 1.45 [0.44; 4.82] | 0.66 [0.34; 1.3] |

Afshari A, Bastholm Bille A, Allingstrup M (2017) Aerosolized prostacyclins for acute respiratory distress syndrome (ARDS). Cochrane Database Syst Rev 7:CD007733 . doi: [10.1002/14651858.CD007733.pub3](https://doi.org/10.1002/14651858.CD007733.pub3)

Aitken LM, Bucknall T, Kent B, et al (2015) Protocol-directed sedation versus non-protocol-directed sedation to reduce duration of mechanical ventilation in mechanically ventilated intensive care patients. Cochrane Database Syst Rev 1:CD009771 . doi: [10.1002/14651858.CD009771.pub2](https://doi.org/10.1002/14651858.CD009771.pub2)

Alarcon JD, Rubiano AM, Okonkwo DO, et al (2017) Elevation of the head during intensive care management in people with severe traumatic brain injury. Cochrane Database Syst Rev 12:CD009986 . doi: [10.1002/14651858.CD009986.pub2](https://doi.org/10.1002/14651858.CD009986.pub2)

Andriolo BN, Andriolo RB, Salomão R, Atallah ÁN (2017) Effectiveness and safety of procalcitonin evaluation for reducing mortality in adults with sepsis, severe sepsis or septic shock. Cochrane Database Syst Rev 1:CD010959 . doi: [10.1002/14651858.CD010959.pub2](https://doi.org/10.1002/14651858.CD010959.pub2)

Avni T, Lador A, Lev S, et al (2015) Vasopressors for the Treatment of Septic Shock: Systematic Review and Meta-Analysis. PLoS ONE 10:e0129305 . doi: [10.1371/journal.pone.0129305](https://doi.org/10.1371/journal.pone.0129305)

Barrington KJ, Finer N, Pennaforte T (2017) Inhaled nitric oxide for respiratory failure in preterm infants. Cochrane Database Syst Rev 1:CD000509 . doi: [10.1002/14651858.CD000509.pub5](https://doi.org/10.1002/14651858.CD000509.pub5)

Barrington KJ, Finer N, Pennaforte T, Altit G (2017) Nitric oxide for respiratory failure in infants born at or near term. Cochrane Database Syst Rev 1:CD000399 . doi: [10.1002/14651858.CD000399.pub3](https://doi.org/10.1002/14651858.CD000399.pub3)

Bednarczyk JM, Fridfinnson JA, Kumar A, et al (2017) Incorporating Dynamic Assessment of Fluid Responsiveness Into Goal-Directed Therapy: A Systematic Review and Meta-Analysis. Crit Care Med 45:1538–1545 . doi: [10.1097/CCM.0000000000002554](https://doi.org/10.1097/CCM.0000000000002554)

Beitland S, Sandven I, Kjærvik L-K, et al (2015) Thromboprophylaxis with low molecular weight heparin versus unfractionated heparin in intensive care patients: a systematic review with meta-analysis and trial sequential analysis. Intensive Care Med 41:1209–1219 . doi: [10.1007/s00134-015-3840-z](https://doi.org/10.1007/s00134-015-3840-z)

Bellù R, de Waal KA, Zanini R (2008) Opioids for neonates receiving mechanical ventilation. Cochrane Database Syst Rev CD004212 . doi: [10.1002/14651858.CD004212.pub3](https://doi.org/10.1002/14651858.CD004212.pub3)

Borthwick EM, Hill CJ, Rabindranath KS, et al (2017) High-volume haemofiltration for sepsis in adults. Cochrane Database Syst Rev 1:CD008075 . doi: [10.1002/14651858.CD008075.pub3](https://doi.org/10.1002/14651858.CD008075.pub3)

Bradt J, Dileo C (2014) Music interventions for mechanically ventilated patients. Cochrane Database Syst Rev CD006902 . doi: [10.1002/14651858.CD006902.pub3](https://doi.org/10.1002/14651858.CD006902.pub3)

Busani S, Damiani E, Cavazzuti I, et al (2016) Intravenous immunoglobulin in septic shock: review of the mechanisms of action and meta-analysis of the clinical effectiveness. Minerva Anestesiol 82:559–572

Chacko B, Peter JV, Tharyan P, et al (2015) Pressure-controlled versus volume-controlled ventilation for acute respiratory failure due to acute lung injury (ALI) or acute respiratory distress syndrome (ARDS). Cochrane Database Syst Rev 1:CD008807 . doi: [10.1002/14651858.CD008807.pub2](https://doi.org/10.1002/14651858.CD008807.pub2)

Constantin J-M, Momon A, Mantz J, et al (2016) Efficacy and safety of sedation with dexmedetomidine in critical care patients: a meta-analysis of randomized controlled trials. Anaesth Crit Care Pain Med 35:7–15 . doi: [10.1016/j.accpm.2015.06.012](https://doi.org/10.1016/j.accpm.2015.06.012)

Dervan LA, Yaghmai B, Watson RS, Wolf FM (2017) The use of methadone to facilitate opioid weaning in pediatric critical care patients: a systematic review of the literature and meta-analysis. Paediatr Anaesth 27:228–239 . doi: [10.1111/pan.13056](https://doi.org/10.1111/pan.13056)

Faria DAS, da Silva EMK, Atallah ÁN, Vital FMR (2015) Noninvasive positive pressure ventilation for acute respiratory failure following upper abdominal surgery. Cochrane Database Syst Rev CD009134 . doi: [10.1002/14651858.CD009134.pub2](https://doi.org/10.1002/14651858.CD009134.pub2)

Fujii T, Ganeko R, Kataoka Y, et al (2018) Polymyxin B-immobilized hemoperfusion and mortality in critically ill adult patients with sepsis/septic shock: a systematic review with meta-analysis and trial sequential analysis. Intensive Care Med 44:167–178 . doi: [10.1007/s00134-017-5004-9](https://doi.org/10.1007/s00134-017-5004-9)

Gebistorf F, Karam O, Wetterslev J, Afshari A (2016) Inhaled nitric oxide for acute respiratory distress syndrome (ARDS) in children and adults. Cochrane Database Syst Rev CD002787 . doi: [10.1002/14651858.CD002787.pub3](https://doi.org/10.1002/14651858.CD002787.pub3)

Gillies D, Todd DA, Foster JP, Batuwitage BT (2017) Heat and moisture exchangers versus heated humidifiers for mechanically ventilated adults and children. Cochrane Database Syst Rev 9:CD004711 . doi: [10.1002/14651858.CD004711.pub3](https://doi.org/10.1002/14651858.CD004711.pub3)

Guay J, Ochroch EA (2015) Intraoperative use of low volume ventilation to decrease postoperative mortality, mechanical ventilation, lengths of stay and lung injury in patients without acute lung injury. Cochrane Database Syst Rev CD011151 . doi: [10.1002/14651858.CD011151.pub2](https://doi.org/10.1002/14651858.CD011151.pub2)

Hu R-F, Jiang X-Y, Chen J, et al (2015) Non-pharmacological interventions for sleep promotion in the intensive care unit. Cochrane Database Syst Rev CD008808 . doi: [10.1002/14651858.CD008808.pub2](https://doi.org/10.1002/14651858.CD008808.pub2)

Huang H-B, Jiang W, Wang C-Y, et al (2018) Stress ulcer prophylaxis in intensive care unit patients receiving enteral nutrition: a systematic review and meta-analysis. Crit Care 22:20 . doi: [10.1186/s13054-017-1937-1](https://doi.org/10.1186/s13054-017-1937-1)

Huang S-Q, Zhang J, Zhang X-X, et al (2017) Can Dexmedetomidine Improve Arterial Oxygenation and Intrapulmonary Shunt during One-lung Ventilation in Adults Undergoing Thoracic Surgery? A Meta-analysis of Randomized, Placebo-controlled Trials. Chin Med J 130:1707–1714 . doi: [10.4103/0366-6999.209891](https://doi.org/10.4103/0366-6999.209891)

Jerath A, Panckhurst J, Parotto M, et al (2017) Safety and Efficacy of Volatile Anesthetic Agents Compared With Standard Intravenous Midazolam/Propofol Sedation in Ventilated Critical Care Patients: A Meta-analysis and Systematic Review of Prospective Trials. Anesth Analg 124:1190–1199 . doi: [10.1213/ANE.0000000000001634](https://doi.org/10.1213/ANE.0000000000001634)

Korang SK, Feinberg J, Wetterslev J, Jakobsen JC (2016) Non-invasive positive pressure ventilation for acute asthma in children. Cochrane Database Syst Rev 9:CD012067 . doi: [10.1002/14651858.CD012067.pub2](https://doi.org/10.1002/14651858.CD012067.pub2)

Kuriyama A, Umakoshi N, Fujinaga J, Takada T (2015) Impact of closed versus open tracheal suctioning systems for mechanically ventilated adults: a systematic review and meta-analysis. Intensive Care Med 41:402–411 . doi: [10.1007/s00134-014-3565-4](https://doi.org/10.1007/s00134-014-3565-4)

Liberati A, D’Amico R, Pifferi S, et al (2009) Antibiotic prophylaxis to reduce respiratory tract infections and mortality in adults receiving intensive care. Cochrane Database Syst Rev CD000022 . doi: [10.1002/14651858.CD000022.pub3](https://doi.org/10.1002/14651858.CD000022.pub3)

Liu D, Yu Z, Yin J, et al (2017) Effect of ulinastatin combined with thymosin alpha1 on sepsis: A systematic review and meta-analysis of Chinese and Indian patients. J Crit Care 39:259–266 . doi: [10.1016/j.jcrc.2016.12.013](https://doi.org/10.1016/j.jcrc.2016.12.013)

Liu F, Wang H-M, Wang T, et al (2016) The efficacy of thymosin α1 as immunomodulatory treatment for sepsis: a systematic review of randomized controlled trials. BMC Infect Dis 16:488 . doi: [10.1186/s12879-016-1823-5](https://doi.org/10.1186/s12879-016-1823-5)

Lu C, Sharma S, McIntyre L, et al (2017) Omega-3 supplementation in patients with sepsis: a systematic review and meta-analysis of randomized trials. Ann Intensive Care 7:58 . doi: [10.1186/s13613-017-0282-5](https://doi.org/10.1186/s13613-017-0282-5)

Moeller C, Fleischmann C, Thomas-Rueddel D, et al (2016) How safe is gelatin? A systematic review and meta-analysis of gelatin-containing plasma expanders vs crystalloids and albumin. J Crit Care 35:75–83 . doi: [10.1016/j.jcrc.2016.04.011](https://doi.org/10.1016/j.jcrc.2016.04.011)

Monro-Somerville T, Sim M, Ruddy J, et al (2017) The Effect of High-Flow Nasal Cannula Oxygen Therapy on Mortality and Intubation Rate in Acute Respiratory Failure: A Systematic Review and Meta-Analysis. Crit Care Med 45:e449–e456 . doi: [10.1097/CCM.0000000000002091](https://doi.org/10.1097/CCM.0000000000002091)

Morag I, Ohlsson A (2016) Cycled light in the intensive care unit for preterm and low birth weight infants. Cochrane Database Syst Rev CD006982 . doi: [10.1002/14651858.CD006982.pub4](https://doi.org/10.1002/14651858.CD006982.pub4)

Nagendran M, McAuley DF, Kruger PS, et al (2017) Statin therapy for acute respiratory distress syndrome: an individual patient data meta-analysis of randomised clinical trials. Intensive Care Med 43:663–671 . doi: [10.1007/s00134-016-4649-0](https://doi.org/10.1007/s00134-016-4649-0)

Ng E, Taddio A, Ohlsson A (2017) Intravenous midazolam infusion for sedation of infants in the neonatal intensive care unit. Cochrane Database Syst Rev 1:CD002052 . doi: [10.1002/14651858.CD002052.pub3](https://doi.org/10.1002/14651858.CD002052.pub3)

Osadnik CR, Tee VS, Carson-Chahhoud KV, et al (2017) Non-invasive ventilation for the management of acute hypercapnic respiratory failure due to exacerbation of chronic obstructive pulmonary disease. Cochrane Database Syst Rev 7:CD004104 . doi: [10.1002/14651858.CD004104.pub4](https://doi.org/10.1002/14651858.CD004104.pub4)

Pandor A, Thokala P, Goodacre S, et al (2015) Pre-hospital non-invasive ventilation for acute respiratory failure: a systematic review and cost-effectiveness evaluation. Health Technol Assess 19:v–vi, 1–102 . doi: [10.3310/hta19420](https://doi.org/10.3310/hta19420)

Peng W, Shimin S, Hongli W, et al (2017) Delirium Risk of Dexmedetomidine and Midazolam in Patients Treated with Postoperative Mechanical Ventilation: a Meta-analysis. Open Med (Wars) 12:252–256 . doi: [10.1515/med-2017-0036](https://doi.org/10.1515/med-2017-0036)

Porhomayon J, Joude P, Adlparvar G, et al (2015) The Impact of High Versus Low Sedation Dosing Strategy on Cognitive Dysfunction in Survivors of Intensive Care Units: A Systematic Review and Meta-Analysis. J Cardiovasc Thorac Res 7:43–48 . doi: [10.15171/jcvtr.2015.10](https://doi.org/10.15171/jcvtr.2015.10)

Pradelli L, Povero M, Bürkle H, et al (2017) Propofol or benzodiazepines for short- and long-term sedation in intensive care units? An economic evaluation based on meta-analytic results. Clinicoecon Outcomes Res 9:685–698 . doi: [10.2147/CEOR.S136720](https://doi.org/10.2147/CEOR.S136720)

Pu S, Wang D, Liu D, et al (2017) Effect of sivelestat sodium in patients with acute lung injury or acute respiratory distress syndrome: a meta-analysis of randomized controlled trials. BMC Pulm Med 17:148 . doi: [10.1186/s12890-017-0498-z](https://doi.org/10.1186/s12890-017-0498-z)

Putzu A, Fang M-X, Boscolo Berto M, et al (2017) Blood purification with continuous veno-venous hemofiltration in patients with sepsis or ARDS: a systematic review and meta-analysis. Minerva Anestesiol 83:867–877 . doi: [10.23736/S0375-9393.17.11946-2](https://doi.org/10.23736/S0375-9393.17.11946-2)

Roberts JA, Abdul-Aziz M-H, Davis JS, et al (2016) Continuous versus Intermittent β-Lactam Infusion in Severe Sepsis. A Meta-analysis of Individual Patient Data from Randomized Trials. Am J Respir Crit Care Med 194:681–691 . doi: [10.1164/rccm.201601-0024OC](https://doi.org/10.1164/rccm.201601-0024OC)

Rose L, Adhikari NK, Leasa D, et al (2017) Cough augmentation techniques for extubation or weaning critically ill patients from mechanical ventilation. Cochrane Database Syst Rev 1:CD011833 . doi: [10.1002/14651858.CD011833.pub2](https://doi.org/10.1002/14651858.CD011833.pub2)

Rose L, Schultz MJ, Cardwell CR, et al (2014) Automated versus non-automated weaning for reducing the duration of mechanical ventilation for critically ill adults and children. Cochrane Database Syst Rev CD009235 . doi: [10.1002/14651858.CD009235.pub3](https://doi.org/10.1002/14651858.CD009235.pub3)

Serpa Neto A, Martin Loeches I, Klanderman RB, et al (2017) Balanced versus isotonic saline resuscitation-a systematic review and meta-analysis of randomized controlled trials in operation rooms and intensive care units. Ann Transl Med 5:323 . doi: [10.21037/atm.2017.07.38](https://doi.org/10.21037/atm.2017.07.38)

Shah SS, Ohlsson A, Halliday HL, Shah VS (2017) Inhaled versus systemic corticosteroids for the treatment of bronchopulmonary dysplasia in ventilated very low birth weight preterm infants. Cochrane Database Syst Rev 10:CD002057 . doi: [10.1002/14651858.CD002057.pub4](https://doi.org/10.1002/14651858.CD002057.pub4)

Shah VS, Ohlsson A, Halliday HL, Dunn M (2017) Early administration of inhaled corticosteroids for preventing chronic lung disease in very low birth weight preterm neonates. Cochrane Database Syst Rev 1:CD001969 . doi: [10.1002/14651858.CD001969.pub4](https://doi.org/10.1002/14651858.CD001969.pub4)

Siempos II, Ntaidou TK, Filippidis FT, Choi AMK (2015) Effect of early versus late or no tracheostomy on mortality and pneumonia of critically ill patients receiving mechanical ventilation: a systematic review and meta-analysis. Lancet Respir Med 3:150–158 . doi: [10.1016/S2213-2600(15)00007-7](https://doi.org/10.1016/S2213-2600(15)00007-7)

Sjövall F, Perner A, Hylander Møller M (2017) Empirical mono- versus combination antibiotic therapy in adult intensive care patients with severe sepsis - A systematic review with meta-analysis and trial sequential analysis. J Infect 74:331–344 . doi: [10.1016/j.jinf.2016.11.013](https://doi.org/10.1016/j.jinf.2016.11.013)

Solé-Lleonart C, Rouby J-J, Blot S, et al (2017) Nebulization of Antiinfective Agents in Invasively Mechanically Ventilated Adults: A Systematic Review and Meta-analysis. Anesthesiology 126:890–908 . doi: [10.1097/ALN.0000000000001570](https://doi.org/10.1097/ALN.0000000000001570)

Stephens RJ, Dettmer MR, Roberts BW, et al (2018) Practice Patterns and Outcomes Associated With Early Sedation Depth in Mechanically Ventilated Patients: A Systematic Review and Meta-Analysis. Crit Care Med 46:471–479 . doi: [10.1097/CCM.0000000000002885](https://doi.org/10.1097/CCM.0000000000002885)

Stuani Franzosi O, Delfino von Frankenberg A, Loss SH, et al (2017) Underfeeding versus full enteral feeding in critically ill patients with acute respiratory failure: a systematic review with meta-analysis of randomized controlled trials. Nutr Hosp 34:19–29

Sud S, Sud M, Friedrich JO, et al (2016) High-frequency oscillatory ventilation versus conventional ventilation for acute respiratory distress syndrome. Cochrane Database Syst Rev 4:CD004085 . doi: [10.1002/14651858.CD004085.pub4](https://doi.org/10.1002/14651858.CD004085.pub4)

Sun B, Wang J, Bo L, et al (2015) Effects of volatile vs. propofol-based intravenous anesthetics on the alveolar inflammatory responses to one-lung ventilation: a meta-analysis of randomized controlled trials. J Anesth 29:570–579 . doi: [10.1007/s00540-015-1987-y](https://doi.org/10.1007/s00540-015-1987-y)

Suresh GK, Davis JM, Soll RF (2001) Superoxide dismutase for preventing chronic lung disease in mechanically ventilated preterm infants. Cochrane Database Syst Rev CD001968 . doi: [10.1002/14651858.CD001968](https://doi.org/10.1002/14651858.CD001968)

Umemura Y, Yamakawa K, Ogura H, et al (2016) Efficacy and safety of anticoagulant therapy in three specific populations with sepsis: a meta-analysis of randomized controlled trials. J Thromb Haemost 14:518–530 . doi: [10.1111/jth.13230](https://doi.org/10.1111/jth.13230)

Volbeda M, Wetterslev J, Gluud C, et al (2015) Glucocorticosteroids for sepsis: systematic review with meta-analysis and trial sequential analysis. Intensive Care Med 41:1220–1234 . doi: [10.1007/s00134-015-3899-6](https://doi.org/10.1007/s00134-015-3899-6)

Wang B, Chen R, Guo X, et al (2017) Effects of levosimendan on mortality in patients with septic shock: systematic review with meta-analysis and trial sequential analysis. Oncotarget 8:100524–100532 . doi: [10.18632/oncotarget.20123](https://doi.org/10.18632/oncotarget.20123)

Wang K, Sun M, Jiang H, et al (2015) Mannitol cannot reduce the mortality on acute severe traumatic brain injury (TBI) patients: a meta-analyses and systematic review. Burns Trauma 3:8 . doi: [10.1186/s41038-015-0006-8](https://doi.org/10.1186/s41038-015-0006-8)

Wu R, Lin S-Y, Zhao H-M (2015) Albuterol in the treatment of acute respiratory distress syndrome: A meta-analysis of randomized controlled trials. World J Emerg Med 6:165–171 . doi: [10.5847/wjem.j.1920-8642.2015.03.001](https://doi.org/10.5847/wjem.j.1920-8642.2015.03.001)

Yang Z-G, Lei X-L, Li X-L (2017) Early application of low-dose glucocorticoid improves acute respiratory distress syndrome: A meta-analysis of randomized controlled trials. Exp Ther Med 13:1215–1224 . doi: [10.3892/etm.2017.4154](https://doi.org/10.3892/etm.2017.4154)

Zhang Y, Ding S, Li C, et al (2017) Effects of N-acetylcysteine treatment in acute respiratory distress syndrome: A meta-analysis. Exp Ther Med 14:2863–2868 . doi: [10.3892/etm.2017.4891](https://doi.org/10.3892/etm.2017.4891)

Zhang Z (2015) Antipyretic therapy in critically ill patients with established sepsis: a trial sequential analysis. PLoS ONE 10:e0117279 . doi: [10.1371/journal.pone.0117279](https://doi.org/10.1371/journal.pone.0117279)

Zheng J, Xiang X, Xiao B, et al (2018) Xuebijing combined with ulinastation benefits patients with sepsis: A meta-analysis. Am J Emerg Med 36:480–487 . doi: [10.1016/j.ajem.2017.12.007](https://doi.org/10.1016/j.ajem.2017.12.007)

Zhu Y, Wang Y, Du B, Xi X (2017) Could remifentanil reduce duration of mechanical ventilation in comparison with other opioids for mechanically ventilated patients? A systematic review and meta-analysis. Crit Care 21:206 . doi: [10.1186/s13054-017-1789-8](https://doi.org/10.1186/s13054-017-1789-8)
